# Supplementary material for: Research Misconduct in Moroccan Medical Professionals: Insights from a Cross-Sectional Study on Attitudes and Experiences
Source: Research Square preprint supplement (doi:10.21203/rs.3.rs-3245937/v1), 2023-08-14
Supplement: Supplementary file 1 [file c2bf2fdf050ab9a1e65551ed.docx]

Educational Survey

PASSPORT 2022 project

“EPIDEMIOLOGY AND STATISTICS FOR ALL”

We are pleased to invite you to participate in this short questionnaire. This questionnaire comes from the Epirheum Education team and will be used to select topics for future training sessions. It will take you 2 minutes to answer this questionnaire, which will help us better meet your needs.

**Section 1: Your general information**

1. Gender (M/F/prefer not to say)

2. Please indicate your age (years)

3. Number of years of scientific research practice (years)

4. Number of years of clinical practice (years)

5. Your city of practice (Drop-down list: Rabat, Casablanca, Marrakech, Tangier, Agadir, Fes, Oujda)

6. Current status:

5th medicine student/Student in 6th medicine/ Student in 7th medicine/Medical doctor

1st year resident/ Others: please specify

7. Have you ever attended a presentation or training on research ethics?

Yes - No- I do not remember

8. Have you ever attended a presentation or training on the critical analysis of articles?

Yes- No -I do not remember

9. Your main discipline:

General medicine/ Dental Medicine/ Surgery/ Biology/ Pharmacy/ Others: please specify

**Section 2: Kalichman Survey**

10. What do you think of the following proposals for action regarding the practice of medical research:

1 Completely disagree / 2 Disagree / 3 Neutral / 4 Agree / 5 Completely agree

Q1. It is never appropriate to report experimental data that have been created without actually having conducted the experiment

Q2. It is never appropriate to alter experimental data to make an experiment

Q3: It is never appropriate to try a variety of different methods of analysis until one is found that yields a result that is statistically significant.

Q4. It is never appropriate to take credit for the words or writing of someone else

Q5. It is never appropriate to take credit for the data generated by someone else

Q6. It is never appropriate to take credit for the ideas generated by someone else

Q7. If you are confident of your findings, it is acceptable to selectively omit contradictory results to expedite publication.

Q8. If you are confident of your findings, it is acceptable to falsify or fabricate data to expedite publication.

Q9. It is more important that data reporting be completely truthful in a publication than in a grant application.

Q10. If you witness someone committing research misconduct, you have an ethical obligation to act.

Q11. If you had witnessed a coworker or peer committing research misconduct, you would be willing to report that misconduct to a responsible official.

Q12. If you had witnessed a supervisor or principal investigator committing research misconduct, you would be willing to report that misconduct to a responsible official.

Q13. If fabricated data are discovered in a published paper, all coauthors must equally share in the blame

Q14. If fabricated data are discovered in a published paper, all coauthors must get the same punishment.

**Section 3: RMSS-Questionnaire**

11. In the course of your work as a scientist, have you adopted, even if only on one occasion, any of the following behaviors in the past two years? never / once / several times / regularly / always

To confirm a hypothesis, invent data following pressure from the organization that would have funded the research?

To confirm a hypothesis, selectively delete or modify data after performing data analysis?

3. Delete data before performing data analysis?

4. Cover up results that contradicted previous research you had published?

5. Use other people's phrases or ideas without their permission?

6. Use other people's phrases or ideas without quoting them?

7. Turn a blind eye to colleagues' use of erroneous data or dubious interpretation of data?

8. Change the results or conclusions of a study under pressure from an organization that (co)funded the research?

9. Do not publish (part of) the results of a study?

10. Not deliberately mentioning an organization that funded your research in the publication of your study?

11. Add to a publication one or more authors who did not fulfill the conditions required to be an author (honorary author)?

12. Selectively modify data after performing data analysis to confirm a hypothesis?

13. Report a p-value rounded down (for example, report that a p-value of 0.054 is less than 0.05)

14. Flag an unexpected result as hypothesized at the outset.

15. Decide to exclude data after considering the impact of this exclusion on the results

16. Decide to collect more data after finding that the results are almost statistically significant

17. Omitting from the list of authors a contributor who deserved to be considered an author

18. Stopped collecting data earlier than planned because the result in question was already statistically significant without formal stopping rules

19. Deliberately omitting important aspects of the study from the document

20. Do not declare a financial or intellectual conflict of interest

21. Spread the results over a larger number of articles than necessary to publish more papers ("salami slicing")?

22. Use confidential information from reviewers for own research?

**Section 4: Know more about you**

In view of the COVID19 pandemic, do we need to change our practice of scientific research? 1 Completely disagree / 2 Disagree / 3 Neutral / 4 Agree / 5 Completely agree

13. In your opinion, what would be the current obstacles to the exercise of biomedical research according to the rules of evidence-based medicine in the context of the COVID19 pandemic?

14. In your opinion, how could the practice of biomedical research be improved?

Training- Motivation- Grant- Others: Please specify

15. In terms of training, which are you interested in (multiple choices possible)?

- How to set up a research protocol?

- How should I formulate my research question?

- How to choose the appropriate study plan?

- How to select the participants?

- How to calculate the sample size?

- How to write a survey, a questionnaire?

- How to validate a questionnaire in several languages?

- How to avoid selection bias?

-How to interpret the results of a descriptive study?

-Statistics for beginners: what are the basics to know?

- How can I publish my work? The path from scientific writing to final publication

- What are the basics of writing a scientific article?

- How to choose the appropriate journal?

-How to present my research project in an attractive way?

- How to choose the right graph/table for your data?

- How to make a poster?

- How to succeed in a PowerPoint presentation?

16. Do you have any other suggestions for education sessions?

Thank you for your cooperation on behalf of the education team.
